# Supplementary material
Source: PubMed Central journal article supplement (PMC5622255)
Supplement: ajtr0009-4111-f6.pdf [file ajtr0009-4111-f6.pdf]

Methylation-mediated silencing of miR-124

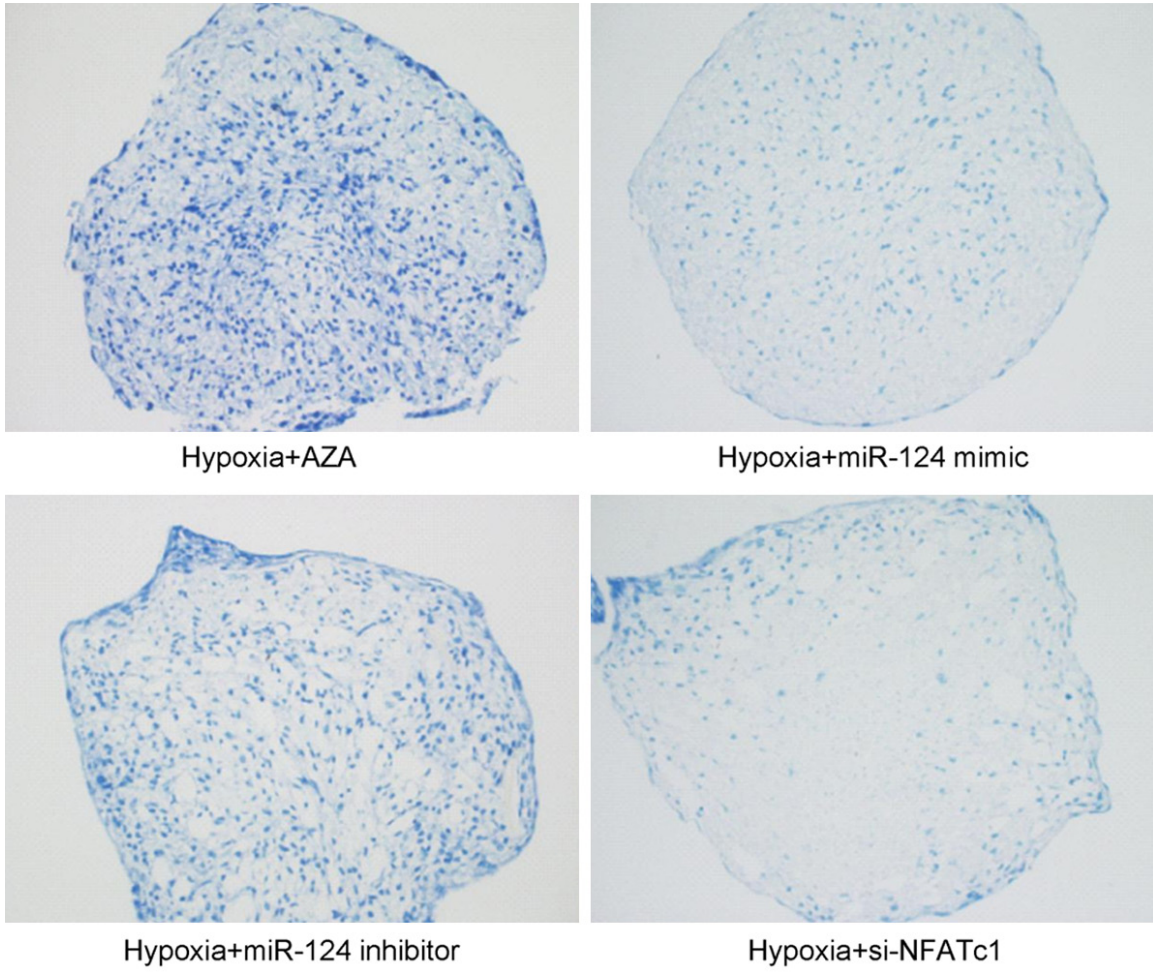

**Supplementary Figure 1.** Toluidine blue stain in day 21 pellet sections of different treatments.
